# Supplementary material
Source: PubMed Central journal article supplement (PMC3732460)
Supplement: NIHMS410389-supplement-supplement_1.pdf [file NIHMS410389-supplement-supplement_1.pdf]

SUPPLEMENTAL MATERIAL

Associations between vascular risk factors, carotid atherosclerosis and cortical volume and thickness in older adults

Valerie A. Cardenas, Ph.D.<sup>1,2</sup>, Bruce Reed, Ph.D.<sup>3</sup>, Linda L. Chao, Ph.D.<sup>1,2</sup>, Helena Chui, M.D.<sup>4</sup>, Nerses Sanossian, M.D.<sup>4</sup>, Charles C. DeCarli, M.D.<sup>3</sup>, Wendy Mack, Ph.D.<sup>4</sup>, Joel Kramer, Psy.D.<sup>1</sup>, Howard N. Hodis, M.D.<sup>4</sup>, Mingzhu Yan, M.D., Ph.D.<sup>4</sup>, Michael H. Buonocore, M.D., Ph.D.<sup>3</sup>, Owen Carmichael, Ph.D.<sup>3</sup>, William J. Jagust, M.D.<sup>5</sup>, Michael W. Weiner, M.D.<sup>1,2</sup>

<sup>1</sup>University of California, San Francisco

<sup>2</sup>Veterans Affairs Medical Center, San Francisco

<sup>3</sup>University of California, Davis

<sup>4</sup>University of Southern California

<sup>5</sup>University of California, Berkeley

**Cover title:** Vascular risk, atherosclerosis, and brain structure

**Corresponding Author:**

Valerie A. Cardenas  
University of California, San Francisco  
Department of Veterans Affairs Medical Center  
4150 Clement St. (114M)  
San Francisco CA 94121  
Tel: (415) 221-4810 x3642  
Fax: (415) 668-2864  
e-mail: valerie.cardenas-nicolson@ieee.org

Table S1: Coronary risk and cortical measures by cognitive status.

|                                          | CDR=0<br>N=94  | CDR=0.5<br>N=58 |
|------------------------------------------|----------------|-----------------|
| FCRP (% risk)                            | 12 ± 7         | 14 ± 8          |
| CIMT (mm)                                | 0.92 ± 0.14    | 0.95 ± 0.14     |
| Gray Matter Volume<br>(mm <sup>3</sup> ) |                |                 |
| Total                                    | 388547 ± 32621 | 387418 ± 33555  |
| Frontal lobe                             | 163397 ± 13598 | 164576 ± 14805  |
| Temporal lobe                            | 108831 ± 10081 | 106959 ± 11051  |
| Parietal lobe                            | 106198 ± 10116 | 105175 ± 8828   |
| Occipital lobe                           | 30420 ± 3947   | 29782 ± 3370    |
| Thickness (mm)                           |                |                 |
| Total                                    | 2.43 ± 0.11    | 2.37 ± 0.10*    |
| Frontal lobe                             | 2.45 ± 0.12    | 2.40 ± 0.10*    |
| Temporal lobe                            | 2.69 ± 0.15    | 2.61 ± 0.16*    |
| Parietal lobe                            | 2.24 ± 0.12    | 2.17 ± 0.09*    |
| Occipital lobe                           | 1.84 ± 0.12    | 1.78 ± 0.10*    |

\* p&lt;0.05

continuous variables are summarized as mean ± SD

continuous variables compared with t-test

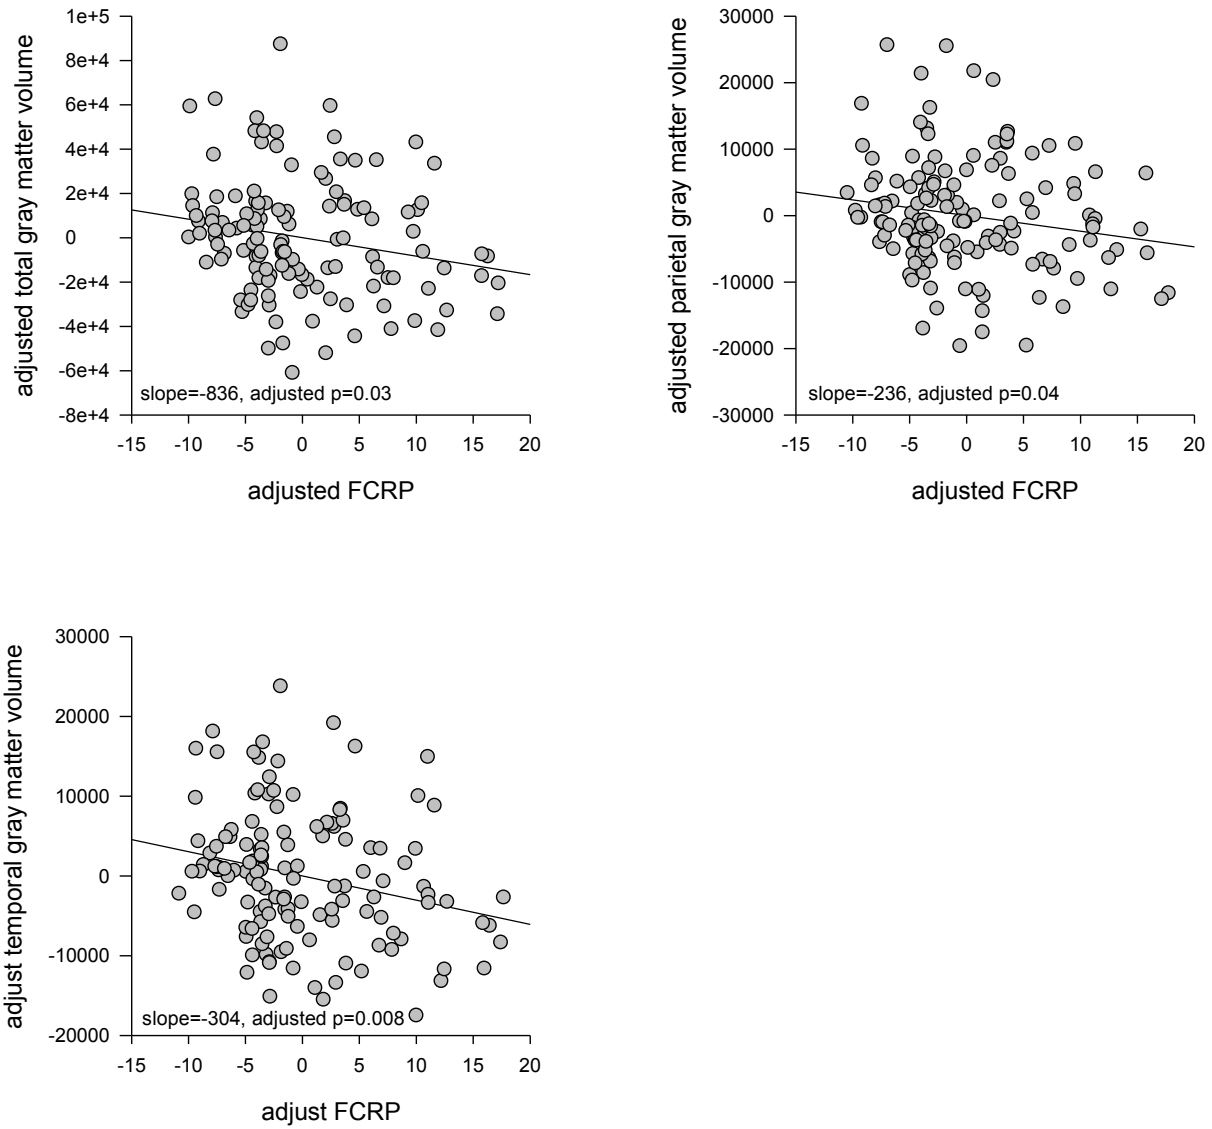

Figure S1: Scatterplots showing the relationships between Freesurfer regional volumes and FCRP. FCRP and volumes were regressed on age, gender, magnet strength, intracranial volume, and cognitive status, and the residuals were plotted against each other. The slope of the line of best fit is the same as the regression coefficient for FCRP in the linear models shown in Table 2.

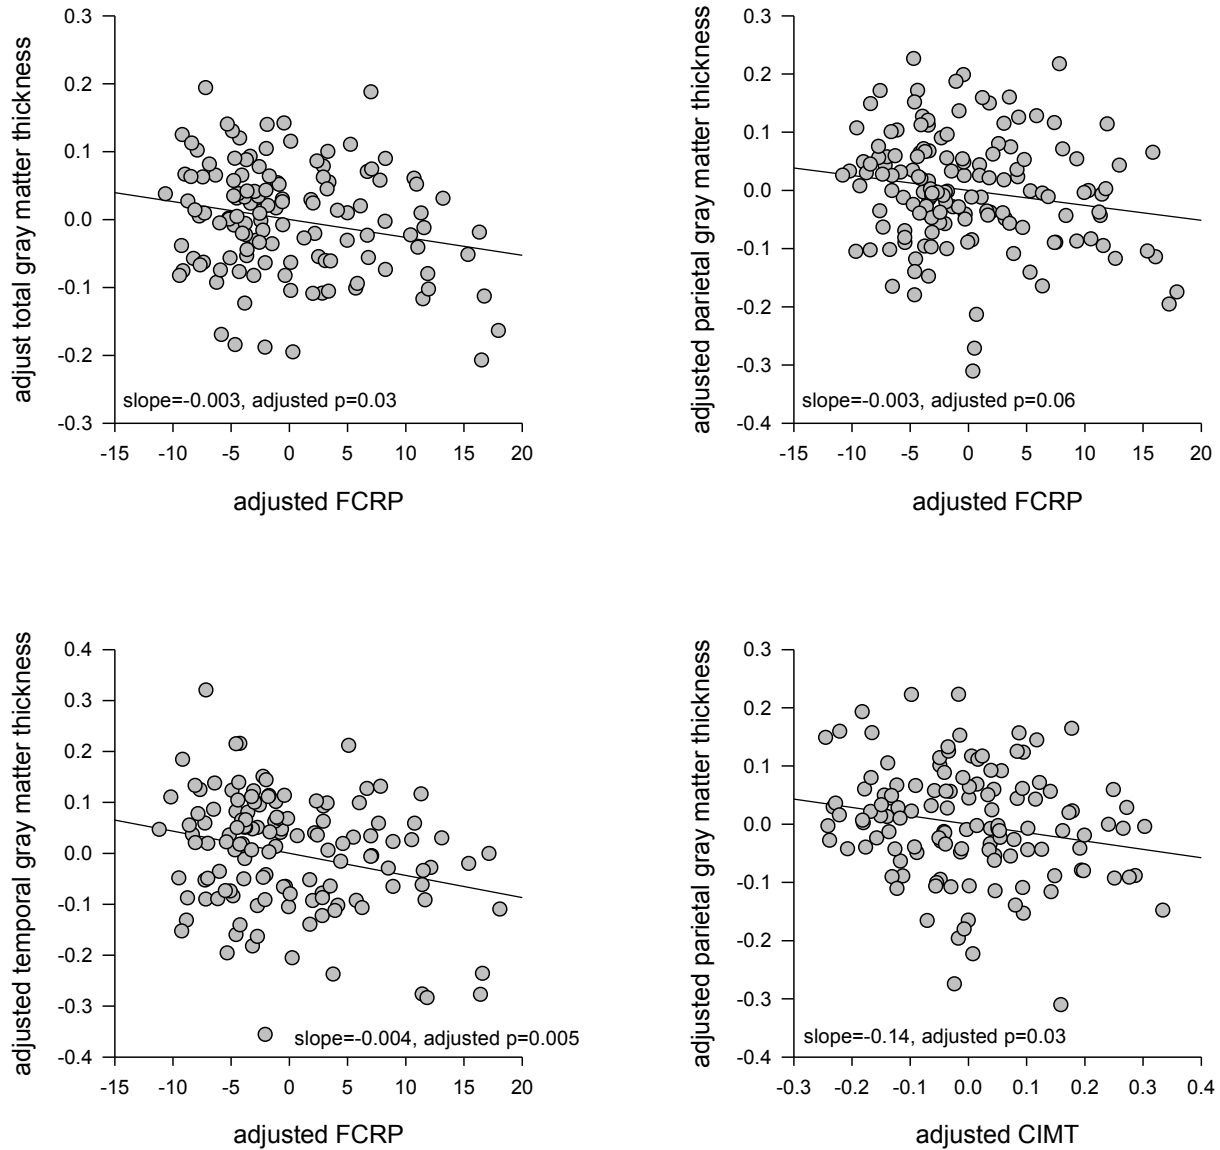

Figure S2: Scatterplots showing the relationships between Freesurfer regional cortical thickness and FCRP or CIMT. FCRP or CIMT and thicknesses were regressed on age, gender, magnet strength, intracranial volume, and cognitive status, and the residuals were plotted against each other. The slope of the line of best fit is the same as the regression coefficient for FCRP or CIMT in the linear models shown in Tables 2 and 3.
